# Supplementary material for: Hyperinsulinemia Induces Insulin Receptor Dysfunction in Brain Microvascular Endothelial Cells
Source: Preprints.org preprint supplement (doi:10.20944/preprints202111.0479.v1), 2021-11-25
Supplement: Supplementary file 1 [file supplementary]

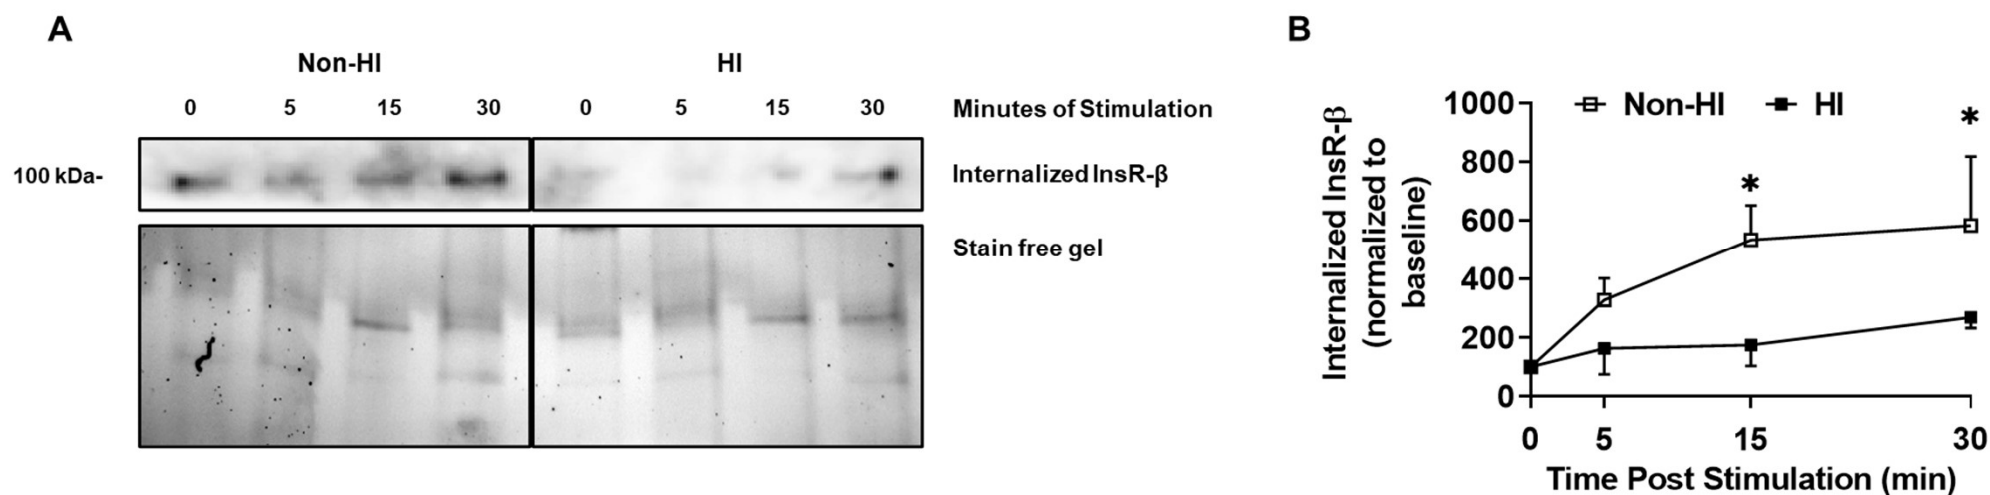

**Fig. S1. Hyperinsulinemic insulin receptors fail to internalize post-stimulation.** (A) Representative immunoblots and (B) densitometry analysis of internalized insulin receptors (InsR- $\beta$ ) following 0, 5, 15, and 30 minutes of stimulation in mouse brain microvascular endothelial cells that are untreated (Non-HI) or incubated in experimental hyperinsulinemic conditions for 12 hours (HI). Data was analyzed via two-way ANOVA with Tukey's multiple comparisons,  $n = 6-8$ /group,  $N = 4$ ; \* $p < 0.05$ . All images were normalized to total gel protein concentrations shown as "Stain Free Gel", calculated in Image Lab software per the manufacturer's instructions. Line down center of immunoblot indicates a break in the blot; images are from the same immunoblot for each figure and received identical formatting. Data from 15 minutes post-stimulation is same as Figure 4 non-HI and HI.
